# Supplementary material for: Case Study: Intra- and Interpersonal Coherence of Muscle and Brain Activity of Two Coupled Persons during Pushing and Holding Isometric Muscle Action
Source: MDPI journal article supplement (doi:10.3390/brainsci12060703), 2022-05-29
Supplement: s1 [file s1]

## Supplementary material

### Article

#### **Case study: intra- and interpersonal coherence of muscle and brain activity of two coupled persons during pushing and holding isometric muscle action**

(Schaefer LV, Bittmann FN)

### Content

|                                                                                              |   |
|----------------------------------------------------------------------------------------------|---|
| <b>Figure S1.</b> Exemplary signals.....                                                     | 2 |
| <b>Table S1.</b> Inter-brain Sum5PaD motor vs. non-motor tasks. ....                         | 3 |
| <b>Table S2.</b> Sum5PaD of force and ACC to MMGs and EEG real vs. random pairs.....         | 3 |
| <b>Table S3.</b> Intra- and interpersonal Sum5PaD of coupled real vs. single-MVIC pairs..... | 4 |
| <b>Table S4.</b> Intrapersonal muscle-brain coherence HIMA vs. PIMA.....                     | 5 |
| <b>Table S5.</b> Interpersonal muscle-brain coherence HIMA vs. PIMA.....                     | 5 |

**Figure S1.** Exemplary signals

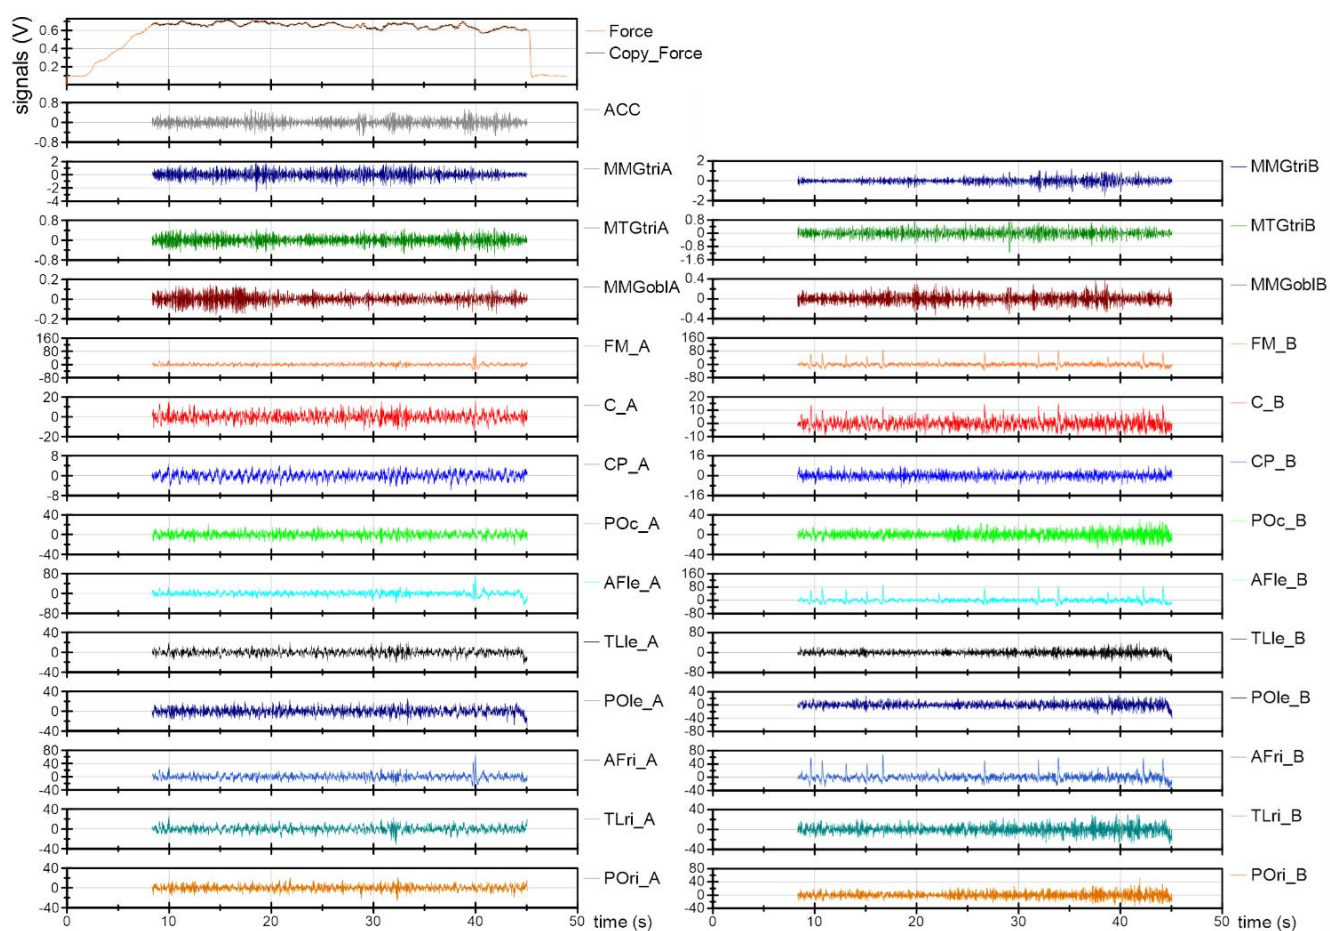

**Figure S1.** Exemplary signals. Displayed are the force, ACC, MMG/MTG and averaged EEG signals (sub-regions) of partner A (left) and B (right) during the isometric plateau of one trial (A-PIMA\_B-HIMA\_1). Signals are filtered and down-sampled.

**Table S1.** Inter-brain Sum5PaD motor vs. non-motor tasks.

Arithmetic means (M), standard deviations (SD), coefficient of variation (CV), t values of paired t-test or z values of Wilcoxon test, degrees of freedom (df), significance p and effect sizes Cohen's d<sub>z</sub> or Pearson's r are given comparing inter-brain coherence of trials during coupled isometric muscle action (AB\_IMA) vs. measurement without motor task but with opened eyes (OpEy).

| Sensor pair      | Mode   | n  | M (%)  | SD    | CV    | t / z  | df | p             | d <sub>z</sub> / r |
|------------------|--------|----|--------|-------|-------|--------|----|---------------|--------------------|
| EEGcen           | AB_IMA | 10 | 19.082 | 4.678 | 0.245 | -2.497 | -  | <b>0.013*</b> | 0.790              |
|                  | OpEy   |    | 9.654  | 5.228 | 0.542 |        |    |               |                    |
| EEGLE            | AB_IMA | 6  | 21.94  | 4.974 | 0.227 | -2.201 | -  | <b>0.028*</b> | 0.782              |
|                  | OpEy   |    | 12.660 | 3.170 | 0.250 |        |    |               |                    |
| EEGri            | AB_IMA | 6  | 20.556 | 3.481 | 0.169 | 5.017  | 5  | <b>0.004</b>  | 2.048              |
|                  | OpEy   |    | 10.194 | 5.552 | 0.545 |        |    |               |                    |
| EEGcen vs. EEGle | AB_IMA | 12 | 20.874 | 4.645 | 0.223 | 3.500  | 11 | <b>0.005</b>  | 1.010              |
|                  | OpEy   |    | 13.199 | 5.436 | 0.412 |        |    |               |                    |
| EEGcen vs. EEGri | AB_IMA | 12 | 19.603 | 3.126 | 0.159 | 3.838  | 11 | <b>0.003</b>  | 1.108              |
|                  | OpEy   |    | 11.145 | 6.085 | 0.546 |        |    |               |                    |
| EEGLE vs. EEGri  | AB_IMA | 9  | 21.32  | 3.573 | 0.168 | 5.253  | 8  | <b>0.001</b>  | 1.751              |
|                  | OpEy   |    | 13.597 | 5.609 | 0.413 |        |    |               |                    |

\*Wilcoxon test. Significant results are written in bold.

**Table S2.** Sum5PaD of force and ACC to MMGs and EEG real vs. random pairs.

Arithmetic means (M), standard deviations (SD), coefficient of variation (CV), t values of paired t-test or z value of Wilcoxon test, degrees of freedom (df), significance p and effect size Cohen's d<sub>z</sub> or Pearson's r of the comparisons between real (AB\_IMA) and random pairs (rand) of the parameter Sum5PaD of force and ACC vs. MMGs and EEGs are given.

| Sensor pair      | Mode   | n | M (%)   | SD     | CV    | t / z  | df | p              | d <sub>z</sub> / r |
|------------------|--------|---|---------|--------|-------|--------|----|----------------|--------------------|
| Force vs. MMGs   | AB_IMA | 6 | 89.820  | 26.470 | 0.295 | 6.035  | 5  | <b>0.002</b>   | 2.464              |
|                  | rand   |   | 17.690  | 14.045 | 0.794 |        |    |                |                    |
| Force vs. EEGcen | AB_IMA | 8 | 41.379  | 12.682 | 0.306 | 5.640  | 7  | <b>0.001</b>   | 1.994              |
|                  | rand   |   | 20.948  | 10.159 | 0.485 |        |    |                |                    |
| Force vs. EEGle  | AB_IMA | 6 | 43.746  | 17.912 | 0.409 | -1.992 | -  | <b>0.046*</b>  | 0.813              |
|                  | rand   |   | 18.233  | 15.781 | 0.866 |        |    |                |                    |
| Force vs. EEGri  | AB_IMA | 6 | 44.754  | 5.823  | 0.130 | 3.530  | 5  | <b>0.017</b>   | 1.441              |
|                  | rand   |   | 22.406  | 13.880 | 0.619 |        |    |                |                    |
| ACC vs. MMGs     | AB_IMA | 6 | 105.825 | 23.729 | 0.224 | 9.006  | 5  | < <b>0.001</b> | 3.676              |
|                  | rand   |   | 22.665  | 12.044 | 0.531 |        |    |                |                    |
| ACC vs. EEGcen   | AB_IMA | 8 | 46.744  | 18.113 | 0.387 | 4.868  | 7  | <b>0.002</b>   | 1.721              |
|                  | rand   |   | 13.830  | 13.084 | 0.946 |        |    |                |                    |
| ACC vs. EEGle    | AB_IMA | 6 | 53.871  | 28.217 | 0.524 | 4.086  | 5  | <b>0.009</b>   | 1.668              |
|                  | rand   |   | 14.428  | 13.547 | 0.939 |        |    |                |                    |
| ACC vs. EEGri    | AB_IMA | 6 | 48.229  | 10.014 | 0.208 | 3.203  | 5  | <b>0.024</b>   | 1.308              |
|                  | rand   |   | 29.294  | 12.948 | 0.442 |        |    |                |                    |

\* Wilcoxon test, effect size is given by Pearson's r. Significant results are written in bold.

**Table S3.** Intra- and interpersonal Sum5PaD of coupled real vs. single-MVIC pairs.

Arithmetic means (M), standard deviations (SD), coefficient of variation (CV), t values of paired t-test or z values of Wilcoxon test, degrees of freedom (df), significance p and effect size Cohen's dz of the signal pairs during the HIMA-PIMA trials of the coupled partners (AB\_IMA) vs. MVIC trials for all regions are given for intrapersonal (above) and interpersonal (below) considerations. For the comparison of the sub-regions of the same region only MMGs, EEGcen, EEGle and EEGri is noted.

| Sensor pair             | Mode   | n  | M (%)   | SD     | CV    | t / z  | df | p              | d <sub>z</sub> / r |
|-------------------------|--------|----|---------|--------|-------|--------|----|----------------|--------------------|
| Intrapersonal coherence |        |    |         |        |       |        |    |                |                    |
| MMGs                    | AB_IMA | 3  | 97.097  | 4.895  | 0.050 | 2.973  | 2  | 0.065          | 2.146              |
|                         | MVIC   |    | 62.845  | 11.150 | 0.177 |        |    |                |                    |
| MMGs vs. EEGcen         | AB_IMA | 12 | 26.164  | 9.840  | 0.376 | 1.334  | -  | 0.182*         | -                  |
|                         | MVIC   |    | 41.935  | 27.238 | 0.650 |        |    |                |                    |
| MMGs vs. EEGle          | AB_IMA | 9  | 33.735  | 9.623  | 0.285 | -1.436 | 8  | 0.189          | 0.479              |
|                         | MVIC   |    | 44.092  | 22.214 | 0.504 |        |    |                |                    |
| MMGs vs. EEGri          | AB_IMA | 9  | 28.557  | 6.406  | 0.224 | -1.869 | 8  | 0.099          | 0.623              |
|                         | MVIC   |    | 43.916  | 24.555 | 0.559 |        |    |                |                    |
| EEGcen                  | AB_IMA | 6  | 89.240  | 14.730 | 0.165 | 1.833  | 5  | 0.126          | 0.748              |
|                         | MVIC   |    | 66.811  | 32.648 | 0.489 |        |    |                |                    |
| EEGle                   | AB_IMA | 3  | 90.717  | 34.711 | 0.383 | 0.696  | 2  | 0.588          | 0.402              |
|                         | MVIC   |    | 82.536  | 55.039 | 0.667 |        |    |                |                    |
| EEGri                   | AB_IMA | 3  | 99.323  | 24.465 | 0.246 | 4.291  | 2  | 0.050          | 2.477              |
|                         | MVIC   |    | 88.010  | 26.336 | 0.299 |        |    |                |                    |
| EEGcen vs. EEGle        | AB_IMA | 12 | 90.205  | 12.243 | 0.136 | 3.259  | 11 | <b>0.008</b>   | 0.941              |
|                         | MVIC   |    | 78.925  | 14.149 | 0.179 |        |    |                |                    |
| EEGcen vs. EEGri        | AB_IMA | 12 | 89.883  | 10.240 | 0.114 | 3.421  | 11 | <b>0.006</b>   | 0.987              |
|                         | MVIC   |    | 73.361  | 20.196 | 0.275 |        |    |                |                    |
| EEGle vs. EEGri         | AB_IMA | 9  | 102.419 | 16.432 | 0.160 | 1.506  | 8  | 0.171          | 0.502              |
|                         | MVIC   |    | 89.631  | 20.814 | 0.232 |        |    |                |                    |
| Interpersonal coherence |        |    |         |        |       |        |    |                |                    |
| MMGs                    | AB_IMA | 6  | 62.450  | 23.429 | 0.375 | 1.721  | 5  | 0.146          | 0.702              |
|                         | MVIC   |    | 37.037  | 14.174 | 0.383 |        |    |                |                    |
| MMGs vs. EEGcen         | AB_IMA | 12 | 55.472  | 15.429 | 0.278 | 5.784  | 11 | < <b>0.001</b> | 1.67               |
|                         | MVIC   |    | 29.969  | 17.85  | 0.596 |        |    |                |                    |
| MMGs vs. EEGle          | AB_IMA | 9  | 63.187  | 15.588 | 0.247 | 4.849  | 8  | <b>0.001</b>   | 1.616              |
|                         | MVIC   |    | 31.747  | 11.084 | 0.349 |        |    |                |                    |
| MMGs vs. EEGri          | AB_IMA | 9  | 61.155  | 11.564 | 0.189 | 5.456  | 8  | <b>0.001</b>   | 1.819              |
|                         | MVIC   |    | 26.071  | 18.73  | 0.718 |        |    |                |                    |
| EEGcen                  | AB_IMA | 10 | 19.082  | 4.678  | 0.245 | -0.693 | 9  | 0.506          | 0.219              |
|                         | MVIC   |    | 22.622  | 14.503 | 0.641 |        |    |                |                    |
| EEGle                   | AB_IMA | 6  | 21.94   | 4.974  | 0.227 | 1.301  | 5  | 0.250          | 0.531              |
|                         | MVIC   |    | 17.488  | 10.785 | 0.617 |        |    |                |                    |
| EEGri                   | AB_IMA | 6  | 20.556  | 3.481  | 0.169 | 1.921  | 5  | 0.113          | 0.784              |
|                         | MVIC   |    | 13.096  | 10.178 | 0.777 |        |    |                |                    |
| EEGcen vs. EEGle        | AB_IMA | 12 | 20.874  | 4.645  | 0.223 | 0.638  | 11 | 0.537          | 0.184              |
|                         | MVIC   |    | 18.888  | 9.898  | 0.524 |        |    |                |                    |
| EEGcen vs. EEGri        | AB_IMA | 12 | 19.603  | 3.126  | 0.159 | -0.846 | 11 | 0.416          | 0.244              |
|                         | MVIC   |    | 21.738  | 8.594  | 0.395 |        |    |                |                    |
| EEGle vs. EEGri         | AB_IMA | 9  | 21.32   | 3.573  | 0.168 | 0.429  | 8  | 0.679          | 0.143              |
|                         | MVIC   |    | 19.762  | 10.998 | 0.557 |        |    |                |                    |

\*Wilcoxon test. Significant results are written in bold.

**Table S4.** Intrapersonal muscle-brain coherence HIMA vs. PIMA.

Arithmetic means (M), standard deviations (SD), coefficient of variation (CV), F values of RM ANOVA or z values of Friedman test, degrees of freedom (df), significance p and effect size eta-squared of the muscle-brain coherence (Sum5PaD) comparing real coupled trials during HIMA vs. PIMA and vs. MVIC trials (PIMA) are given for intrapersonal considerations.

| Sensor pair                    | Mode | n  | M (%)  | SD     | CV    | F / z              | df        | p            | $\eta^2$ |
|--------------------------------|------|----|--------|--------|-------|--------------------|-----------|--------------|----------|
| <b>Intrapersonal coherence</b> |      |    |        |        |       |                    |           |              |          |
| MMGs vs. EEGcen                | HIMA | 24 | 26.085 | 9.454  | 0.362 | 4.083*             | -         | 0.130        | -        |
|                                | PIMA |    | 26.243 | 17.400 | 0.663 |                    |           |              |          |
|                                | MVIC |    | 41.935 | 31.336 | 0.747 |                    |           |              |          |
| MMGs vs. EEGle                 | HIMA | 18 | 36.306 | 12.626 | 0.348 | 2.599 <sup>a</sup> | 1.4, 23.3 | 0.111        | -        |
|                                | PIMA |    | 31.165 | 15.658 | 0.502 |                    |           |              |          |
|                                | MVIC |    | 44.092 | 29.368 | 0.666 |                    |           |              |          |
| MMGs vs. EEGri                 | HIMA | 18 | 30.120 | 9.550  | 0.317 | 5.367 <sup>a</sup> | 1.6, 19.8 | <b>0.027</b> | 0.24     |
|                                | PIMA |    | 26.994 | 7.805  | 0.289 |                    |           |              |          |
|                                | MVIC |    | 43.916 | 26.254 | 0.598 |                    |           |              |          |

\*Friedman test. <sup>a</sup>Greenhouse-Geisser correction. Significant results are written in bold.

**Table S5.** Interpersonal muscle-brain coherence HIMA vs. PIMA.

Arithmetic means (M), standard deviations (SD), coefficient of variation (CV), values of paired t test, degrees of freedom (df), significance p and effect size Cohen's  $d_z$  of the interpersonal muscle-brain coherence (Sum5PaD) comparing HIMA vs. PIMA of real coupled trials are given.

| Sensor pair                    | Mode | n | M (%)  | SD     | CV    | t      | df | p            | $d_z$ |
|--------------------------------|------|---|--------|--------|-------|--------|----|--------------|-------|
| <b>Interpersonal coherence</b> |      |   |        |        |       |        |    |              |       |
| MMGs vs. EEGcen                | HIMA | 8 | 58.568 | 16.869 | 0.288 | -2.406 | 7  | <b>0.047</b> | 0.673 |
|                                | PIMA |   | 52.376 | 17.584 | 0.336 |        |    |              |       |
|                                | MVIC |   | 69.240 | 20.231 | 0.292 |        |    |              |       |
| MMGs vs. EEGle                 | HIMA | 6 | 57.135 | 19.789 | 0.346 | -4.429 | 5  | <b>0.007</b> | 0.893 |
|                                | PIMA |   | 64.165 | 18.915 | 0.295 |        |    |              |       |
|                                | MVIC |   | 58.145 | 17.430 | 0.300 |        |    |              |       |
| MMGs vs. EEGri                 | HIMA | 6 | 58.568 | 16.869 | 0.288 | -1.783 | 5  | 0.135        | -     |
|                                | PIMA |   | 52.376 | 17.584 | 0.336 |        |    |              |       |
|                                | MVIC |   | 69.240 | 20.231 | 0.292 |        |    |              |       |

Significant results are written in bold.
